# Supplementary material
Source: HighWire-hosted journal article supplement (https://tech.snmjournals.org/highwire/filestream/8656/field_highwire_adjunct_files/0/172742_Supplemental_Data.pdf)

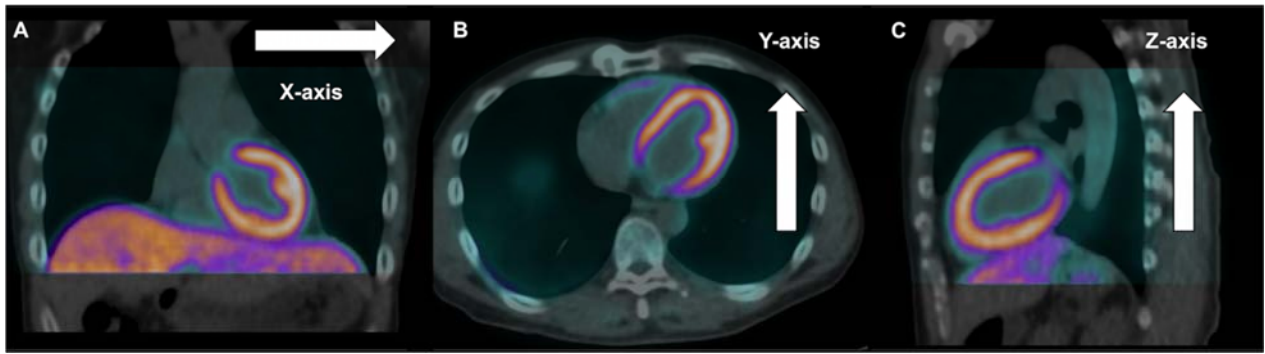

Color version of Figure 1.

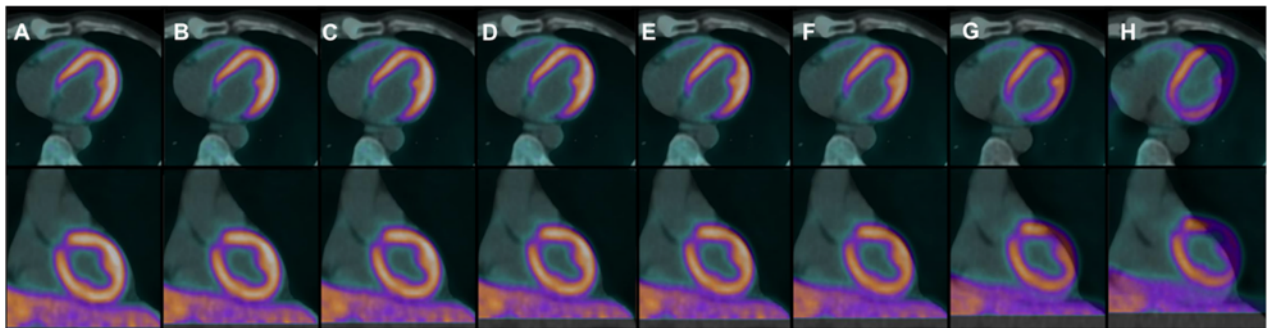

Color version of Figure 2.

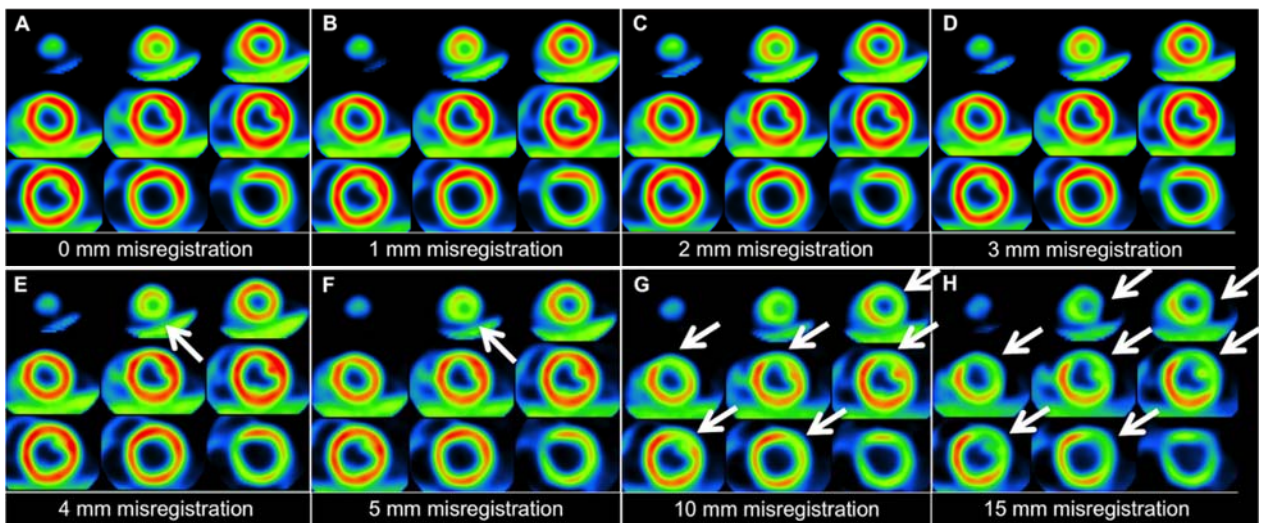

Color version of Figure 3.

Supplement: 172742_Supplemental_Data.pdf [file 172742_Supplemental_Data.pdf]
